# Supplementary material for: Infection-related ventilator-associated complications in ICU patients colonised with extended-spectrum β-lactamase-producing Enterobacteriaceae
Source: Springer Nature journal article supplement (doi:10.1007/s00134-018-5154-4), 2018-04-16
Supplement: MOESM1 [file 15701758]

**ELECTRONIC SUPPLEMENTARY MATERIAL**

**Infection-related ventilator-associated complications in ICU patients colonized with extended-spectrum β-lactamase-producing *Enterobacteriaceae***

François Barbier, Sébastien Bailly, Carole Schwebel, Laurent Papazian, Élie Azoulay, Hatem Kallel, Shidasp Siami, Laurent Argaud, Guillaume Marcotte, Benoît Misset, Jean Reignier, Michaël Darmon, Jean-Ralph Zahar, Dany Goldgran-Toledano, Étienne de Montmollin, Bertrand Souweine, Bruno Mourvillier, and Jean-François Timsit, for the OUTCOMEREA Study Group

**Box.** Centers for Disease Control and Prevention – Ventilator-Associated Events Surveillance Algorithm

- **Criteria for ventilator-associated condition (VAC)**

After a period of stability or improvement on the ventilator (defined by ≥ 2 calendar days of stable or decreasing daily minimum* FiO2 or PEEP values), the patient has at least one of the following indicators of worsening oxygenation:

1. Increase in daily minimum* FiO2 of ≥ 0.20 (20 points) over the daily minimum FiO2 in the baseline period, sustained for ≥ 2 calendar days.
2. Increase in daily minimum* PEEP values of ≥ 3 cmH2O over the daily minimum PEEP in the baseline period†, sustained for ≥ 2 calendar days.

**Daily minimum defined by lowest value of FiO2 or PEEP during a calendar day that is maintained for at least 1 hour*

*†Daily minimum PEEP values of 0-5 cmH2O are considered equivalent for the purposes of VAE surveillance*

- **Criteria for infection-related ventilator-associated complication (IVAC)**

On or after calendar day 3 of mechanical ventilation and within 2 calendar days before or after the onset of worsening oxygenation, the patient meets both of the following criteria:

1. Temperature > 38°C or < 36°C, **OR** white blood cell count ≥ 12,000 cells/mm3 or ≤ 4,000 cells/mm3.

**AND**

1. A new antimicrobial agent(s) is started and continued for ≥ 4 calendar days.

- **Criteria for possible ventilator-associated pneumonia (PVAP)**

On or after calendar day 3 of mechanical ventilation and within 2 calendar days before or after the onset of worsening oxygenation, ONE of the following criteria is met (taking into account organism exclusions specified in the protocol):

1. **Criterion 1:** Positive culture of one of the following specimens, meeting quantitative or semi-quantitative thresholds as outlined in protocol, without requirement for purulent respiratory secretions:

- Endotracheal aspirate, ≥ 105 CFU/ml or corresponding semi-quantitative result
- Bronchoalveolar lavage, ≥ 104 CFU/ml or corresponding semi-quantitative result
- Lung tissue, ≥ 104 CFU/g or corresponding semi-quantitative result
- Protected specimen brush, ≥ 103 CFU/ml or corresponding semi-quantitative result

1. **Criterion 2:** Purulent respiratory secretions (defined as secretions from the lungs, bronchi, or trachea that contain >25 neutrophils and <10 squamous epithelial cells per low power field [lpf, x100])† plus organism identified from one of the following specimens (to include qualitative culture, or quantitative/semi-quantitative culture without sufficient growth to meet criterion #1):

- Sputum
- Endotracheal aspirate
- Bronchoalveolar lavage
- Lung tissue
- Protected specimen brush

*† If the laboratory reports semi-quantitative results, those results must correspond to the above quantitative thresholds*

1. **Criterion 3:** One of the following positive tests:

- Organism identified from pleural fluid (where specimen was obtained during thoracentesis or initial placement of chest tube and NOT from an indwelling chest tube)
- Lung histopathology, defined as: 1) abscess formation or foci of consolidation with intense neutrophil accumulation in bronchioles and alveoli; 2) evidence of lung parenchyma invasion by fungi (hyphae, pseudohyphae or yeast forms); 3) evidence of infection with the viral pathogens listed below based on results of immunohistochemical assays, cytology, or microscopy performed on lung tissue
- Diagnostic test for Legionella species
- Diagnostic test on respiratory secretions for influenza virus, respiratory syncytial virus, adenovirus, parainfluenza virus, rhinovirus, human metapneumovirus, coronavirus

**Table S1.** Mean annual number of patients included in the OUTCOMEREA database in ICUs contributing to the study

| **Study year** | **Number of patients per ICU (mean)** | **Number of contributing ICUs per year** |
| --- | --- | --- |
| 1997 | 121.3 | 4 |
| 1998 | 70.4 | 5 |
| 1999 | 75.0 | 5 |
| 2000 | 68.2 | 5 |
| 2001 | 37.4 | 5 |
| 2002 | 87.0 | 6 |
| 2003 | 68.7 | 6 |
| 2004 | 68.5 | 6 |
| 2005 | 52.4 | 7 |
| 2006 | 296.5 | 6 |
| 2007 | 258.1 | 7 |
| 2008 | 250.5 | 8 |
| 2009 | 209.3 | 7 |
| 2010 | 151.5 | 8 |
| 2011 | 86.8 | 10 |
| 2012 | 104.1 | 10 |
| 2013 | 189.9 | 9 |
| 2014 | 161.1 | 7 |
| 2015 | 132.8 | 8 |

**Table S2.** Causes of the 576 episodes of IVAC

|  | **Causes of IVAC** | | | |  |  |
| --- | --- | --- | --- | --- | --- | --- |
| **Variable** | **No documented infection**  **(n = 361)** | **Non-VAP infection**  **(n = 124)** | **Non-ESBLE VAP**  **(n = 73)** | **ESBLE VAP**  **(n = 18)** |  | ***P* value** |
| **IVAC rank**  1st episode  2nd episode  3rd episode  4th episode  5th episode | 197 (54.6)  91 (25.2)  41 (11.4)  26 (7.2)  6 (1.7) | 75 (60.5)  29 (23.4)  17 (13.7)  3 (2.4)  0 | 34 (46.6)  24 (32.9)  8 (11)  5 (6.8)  2 (2.7) | 12 (66.7)  4 (22.2)  2 (11.1)  0  0 |  | 0.42 |
| **Time from ICU admission to IVAC, days** | 18 [8-29] | 15 [9-25] | 20 [12-27] | 13.5 [10-21] |  | 0.42 |
| **Time from ESBLE colonization to IVAC, days** | 11 [6-20] | 10 [5-17] | 10 [5-19] | 7 [4-12] |  | 0.11 |
| **Identified causes per episode**  0  1  2  3  4  5 | 264 (73.1)  73 (20.2)  22 (6.1)  1 (0.3)  1 (0.3)  0 | 0  76 (61.3)  34 (27.4)  8 (6.5)  6 (4.8)  0 | 0  38 (52.1)  21 (28.8)  10 (13.7)  2 (2.7)  2 (2.7) | 0  5 (27.8)  8 (44.4)  4 (22.2)  1 (5.6)  0 |  | <0.01 |
| **ICU-acquired infections, overall**  VAP  Non-catheter-related bloodstream infection  Major catheter-related infection a  Urinary tract infection  Surgical site infection  Ventilator-associated tracheobronchitis  Viral infection  *Clostridium difficile*-associated diarrhoea  Sinusitis  Fasciitis  Arthritis  Meningitis | 0  0  0  0  0  0  0  0  0  0  0  0 | 0  46 (37.1)  26 (21)  28 (22.6)  23 (18.5)  7 (5.6)  3 (2.4)  2 (1.6)  2 (1.6)  1 (0.8)  1 (0.8)  1 (0.8) | 73 (100)  11 (15.1)  6 (8.2)  9 (12.3)  1 (1.4)  0  1 (1.4)  2 (2.7)  1 (1.4)  0  0  0 | 18 (100)  2 (11.1)  5 (27.8)  3 (16.7)  1 (5.6)  0  0  1 (5.6)  0  0  0  0 |  | NA  <0.01  <0.01  <0.01  <0.01  <0.01  0.04  <0.01  0.12  0.30  0.30  0.30 |
| **ICU-acquired infections due to ESBLE**  All (pooled)  VAP  Others than VAP | 0  0  0 | 20 (16.1)  0  20 (16.1) | 5 (6.8)  0  5 (6.8) | 18 (100)  18 (100)  5 (27.8) |  | <0.01  NA  <0.01 |

**Table S2 (continued).**

|  | **Causes of IVAC** | | | |  |  |
| --- | --- | --- | --- | --- | --- | --- |
| **Variable** | **No documented infection**  **(n = 361)** | **Non-VAP infection**  **(n = 124)** | **Non-ESBLE VAP**  **(n = 73)** | **ESBLE VAP**  **(n = 18)** |  | ***P* value** |
| **Non-infectious events**  In-hospital transport  Hypoglycemia  Fluid challenge  Atelectasis  Self-extubation  Gastrointestinal haemorrhage  Accidental extubation  Cardiac arrest  Ileus  Pneumothorax  Post-extubation laryngeal oedema  Deep venous thrombosis  Cardioversion  Drug allergy  Venous puncture accident  Failure of planned extubation  Acute myocardial infarction | 42 (11.6)  17 (4.7)  12 (3.3)  10 (2.8)  9 (2.5)  8 (2.2)  5 (1.4)  4 (1.1)  3 (0.8)  2 (0.6)  2 (0.6)  2 (0.6)  2 (0.6)  1 (0.3)  1 (0.3)  0  0 | 17 (13.7)  10 (8.1)  2 (1.6)  1 (0.8)  3 (2.4)  3 (2.4)  0  1 (0.8)  0  2 (1.6)  2 (1.6)  1 (0.8)  0  4 (3.2)  2 (1.6)  1 (0.8)  1 (0.8) | 13 (17.8)  5 (6.8)  5 (6.8)  1 (1.4)  0  0  1 (1.4)  0  0  1 (1.4)  1 (1.4)  0  0  1 (1.4)  0  1 (1.4)  0 | 0  0  0  0  1 (5.6)  1 (5.6)  2 (11.1)  1 (5.6)  0  0  0  0  0  0  0  0  0 |  | 0.18  0.35  0.20  0.50  0.44  0.44  <0.01  0.22  0.62  0.66  0.66  0.88  0.75  0.04  0.29  0.23  0.30 |

***Table S2 footnote***

Data are expressed as number (%) or median [interquartile range].

IVAC, infection-related ventilator-associated complication; ESBLE, extended-spectrum β-lactamase-producing *Enterobacteriaceae*; VAP, ventilator-associated pneumonia; ICU, intensive care unit

a Defined as catheter infections with systemic inflammatory response syndrome, sepsis and/or catheter-related bloodstream infection

**Table S3.** Characteristics of IVAC episodes per type of ESBLE carriage (imported versus ICU-acquired)

|  | **Type of ESBLE carriage** | |  |  |
| --- | --- | --- | --- | --- |
| **Variable** | **Imported**  **(n = 306 IVAC)** | **ICU-acquired**  **(n = 270 IVAC)** |  | ***P* value** |
| **IVAC rank**  1st episode  2nd episode  3rd episode  4th episode  5th episode | 169 (55.2)  78 (25.5)  36 (11.8)  18 (5.9)  5 (1.6) | 149 (55.2)  70 (25.9)  32 (11.9)  16 (5.9)  3 (1.1) |  | 0.99 |
| **Time from ICU admission to IVAC, days** | 11 [7-21] | 24 [17-36] |  | <0.01 |
| **Time from ESBLE colonization to IVAC, days** | 11 [6-20] | 10 [4-18] |  | 0.03 |
| **Identified causes per episode**  0  1  2  3  4  5 | 144 (47.1)  94 (30.7)  49 (16)  11 (3.6)  7 (2.3)  1 (0.3) | 120 (44.4)  98 (36.3))  36 (13.3)  12 (4.4)  3 (1.1)  1 (0.4) |  | 0.73 |
| **Types of IVAC**  No documented infection  Non-VAP infection  Non-ESBLE VAP  ESBLE VAP | 195 (63.7)  70 (22.9)  34 (11.1)  7 (2.3) | 166 (61.5)  54 (20)  39 (14.4)  11 (4.1) |  | 0.34 |
| **ICU-acquired infections**  Non-catheter-related bloodstream infection  Urinary tract infection  Major catheter-related infection a  Surgical site infection  Ventilator-associated tracheobronchitis  Viral infection  *Clostridium difficile*-associated diarrhoea  Sinusitis  Fasciitis  Arthritis  Meningitis | 32 (10.5)  19 (6.2)  16 (5.2)  14 (4.6)  6 (2)  3 (1)  2 (0.7)  2 (0.7)  1 (0.3)  1 (0.3)  1 (0.3) | 27 (10)  21 (7.8)  21 (7.8)  11 (4.1)  1 (0.4)  1 (0.4)  3 (1.1)  1 (0.4)  0 (0)  0 (0)  0 (0) |  | 0.86  0.46  0.21  0.77  0.08  0.38  0.55  0.64  0.35  0.35  0.35 |

**Table S3 (continued).**

|  | **Type of ESBLE carriage** | |  |  |
| --- | --- | --- | --- | --- |
| **Variable** | **Imported**  **(n = 306 IVAC)** | **ICU-acquired**  **(n = 270 IVAC)** |  | ***P* value** |
| **Non-infectious events**  In-hospital transport  Hypoglycemia  Fluid challenges  Self-extubation  Atelectasis  Gastrointestinal haemorrhage  Accidental extubation  Post-extubation laryngeal oedema  Cardiac arrest  Pneumothorax  Drug allergy  Deep venous thrombosis  Cardioversion  Venous puncture accident  Failure of planned extubation  Acute myocardial infarction  Ileus | 37 (12.1)  24 (7.8)  10 (3.3)  10 (3.3)  8 (2.6)  5 (1.6)  5 (1.6)  5 (1.6)  4 (1.3)  4 (1.3)  2 (0.7)  2 (0.7)  2 (0.7)  1 (0.3)  1 (0.3)  1 (0.3)  0 (0) | 35 (13)  8 (3)  9 (3.3)  3 (1.1)  4 (1.5)  7 (2.6)  3 (1.1)  0 (0)  2 (0.7)  1 (0.4)  4 (1.5)  1 (0.4)  0 (0)  2 (0.7)  1 (0.4)  0 (0)  3 (1.1) |  | 0.75  0.01  0.97  0.08  0.34  0.42  0.59  0.03  0.50  0.23  0.33  0.64  0.18  0.49  0.93  0.35  0.06 |

***Table S3 footnote***

Data are expressed as number (%) or median [interquartile range].

IVAC, infection-related ventilator-associated complication; ESBLE, extended-spectrum β-lactamase-producing *Enterobacteriaceae*; ICU, intensive care unit; VAP, ventilator-associated pneumonia

a Defined as catheter infections with systemic inflammatory response syndrome, sepsis and/or catheter-related bloodstream infection

**Table S4.** Classification of IVAC episodes per species of carriage isolates of ESBLE

| **ESBLE species** | **No documented infection**  **(n = 361 IVAC)** | **Non-VAP infection**  **(n = 124 IVAC)** | **Non-ESBLE VAP**  **(n = 73 IVAC)** | **ESBLE VAP**  **(n = 18 IVAC)** |
| --- | --- | --- | --- | --- |
| *Escherichia coli* | 130 (36) | 49 (39.4) | 20 (27.4) | 8 (44.4) |
| *Klebsiella pneumoniae* | 73 (20.2) | 26 (21) | 13 (17.8) | 7 (38.9) |
| *Enterobacter* spp | 56 (15.5) | 15 (12.1) | 13 (17.8) | 2 (11.1) |
| *Citrobacter* spp | 20 (5.5) | 9 (7.3) | 5 (6.8) | 0 |
| Others / unspecified | 82 (22.8) | 25 (20.2) | 22 (30.2) | 1 (5.6) |

***Table S4 footnote***

Data are expressed as number (%).

IVAC, infection-related ventilator-associated complication; ESBLE, extended-spectrum β-lactamase-producing *Enterobacteriaceae*; VAP, ventilator-associated pneumonia

χ2 test (global comparison), *P* = 0.43

**Table S5.** Factors associated with an ESBLE infection as the causative event of IVAC: results of univariate logistic regression analysis

| **Variable** | **IVAC unrelated to an ESBLE infection**  **n = 533** | **IVAC related to an ESBLE infection**  **n = 43** | **Univariate OR [95% CI]** | ***P* value** |
| --- | --- | --- | --- | --- |
| **Age, years** | 67.7 [59 -76.3] | 68.8 [59.5-79.8] | 1 [0.98-1.03] | 0.55 |
| **Sex, male** | 376 (70.5) | 31 (72.1) | 1.1 [0.58-2.29] | 0.68 |
| **Body mass index, kg per m2** | 25.7 [21.9 ; 28.8] | 24.1 [20.8 ; 33.8] | 1 [1-1] | 0.32 |
| **Diabetes mellitus** | 86 (16.1) | 8 (18.6) | 1 [1-1.01] | 0.33 |
| **COPD** | 26 (4.9) | 3 (7) | 1.3 [0.32-5.21] | 0.76 |
| **Immunosuppression** | 91 (17.1) | 7 (16.3) | 0.9 [0.39-2.05] | 0.79 |
| **MacCabe score**  0  1  2 | 288 (54)  194 (36.4)  51 (9.6) | 15 (34.9)  18 (41.9)  10 (23.3) | 1 (ref)  1.8 [0.86-3.59]  3.7 [1.41-9.59] | 0.08  0.08  0.08 |
| **Hospital LOS before ICU admission**  Median  < 10 days  10 to 25 days  25 to 40 days  > 40 days | 3 [1 ; 16]  116 (21.8)  140 (26.3)  123 (23.1)  154 (28.9) | 1 [1 ; 2]  17 (39.5)  9 (20.9)  11 (25.6)  6 (13.9) | 1 (ref)  0.4 [0.13-1.45]  0.2 [0.05-0.88]  0.2 [0.07-0.8] | 0.01  0.01  0.01  0.01 |
| **Type of ICU stay**  Medical  Surgical, unscheduled  Surgical, scheduled | 364 (68.3)  119 (22.3)  50 (9.4) | 30 (69.8)  6 (14)  7 (16.3) | 2 [1-1]  0.6 [0.24-1.42]  1.7 [0.55-5.03] | 0.25  0.25  0.25 |
| **Characteristics at ICU admission**  Coma  Sepsis  Sepsis sévère  SAPS II  SOFA score  3GC use  Carbapenem use | 68 (12.8)  427 (80.1)  382 (71.7)  37 [29 ; 47]  7 [4 ; 10]  209 (39.2)  89 (16.7) | 3 (7)  31 (72.1)  28 (65.1)  37 [27 ; 48]  7 [4 ; 9]  18 (41.9)  6 (14) | 0.6 [0.16-1.87]  0.6 [0.31-1.29]  0.7 [0.36-1.4]  1 [0.97-1]  0.9 [0.88-1.03]  1.1 [0.56-2.2]  0.8 [0.34-2.05] | 0.26  0.25  0.35  0.05  0.18  0.76  0.69 |
| **ESBLE carriage**  ICU LOS before carriage  ICU-acquired carriage  Carriage of ESBL-producing *Escherichia coli* | 3 [0 ; 10]  246 (46.1)  188 (35.3) | 7 [1 ; 13]  24 (55.8)  19 (44.2) | 1 [0.99-1.03]  1.4 [0.73-2.8]  1.5 [0.74-2.87] | 0.50  0.29  0.31 |
| **Previous IVAC episode** | 244 (45.8) | 14 (32.6) | 0.6 [0.29-1.12] | 0.09 |
| **Characteristics at IVAC Day**  Blood lactates, mmol/L-1  WBC, per mm3  Steroids use  Urinary catheter  Arterial line catheter  Central venous catheter  Vasopressors  Renal replacement therapy  Enteral nutrition  Parenteral nutrition  Proton-pump inhibitor  Prior CDAD  MDRPA carriage  AHE carriage | 1.3 [1-1.8]  12,850 [9,050-17,535]  150 (28.2)  473 (88.7)  151 (28.3)  321 (60.2)  170 (31.9)  69 (12.9)  373 (70)  143 (26.8)  349 (65.5)  21 (3.9)  20 (3.8)  23 (4.3) | 1.5 [1.2-1.7]  11,370 [8,600-15,390]  13 (30.2)  39 (90.7)  13 (30.2)  25 (58.1)  14 (32.6)  8 (18.6)  27 (62.8)  15 (34.9)  31 (72.1)  1 (2.3)  2 (4.7)  1 (2.3) | 1 [0.94-1.16]  1 [1-1]  1.1 [0.55-2.15]  1.3 [0.39-4.17]  1.2 [0.6-2.36]  1 [0.52-1.8]  1.1 [0.55-2.03]  1.5 [0.62-3.5]  0.7 [0.4-1.37]  1.5 [0.8-2.68]  1.4 [0.69-2.83]  0.6 [0.08-4.33]  1.4 [0.31-6.55]  0.5 [0.07-2.89] | 0.52  0.42  0.81  0.65  0.64  0.93  0.87  0.45  0.36  0.24  0.34  0.53  0.69  0.24 |
| **ICU LOS before IVAC**  Median, days  LOS ≥ 13 days | 18 [9-28]  320 (60) | 13 [9-28]  19 (44.2) | 1 [0.96-1.01]  0.5 [0.26-0.87] | 0.15  0.03 |

| **Variable** | **IVAC unrelated to an ESBLE infection**  **n = 533** | **IVAC related to an ESBLE infection**  **n = 43** | **Univariate OR [95% CI]** | ***P* value** |
| --- | --- | --- | --- | --- |
| **SOFA score at Day-1 IVAC**  Median  Circulatory > 1  Circulatory > 2  Hepatic > 1  Hepatic > 2  Neurological > 1  Neurological > 2  Renal > 1  Renal > 2  Haematological > 1  Haematological > 2  Respiratory > 1  Respiratory > 2 | 4 [2-7]  160 (30)  148 (27.8)  85 (15.9)  31 (5.8)  162 (30.4)  74 (13.9)  172 (32.3)  110 (20.6)  99 (18.6)  38 (7.1)  85 (15.9)  50 (9.4) | 4 [2-7]  14 (32.6)  11 (25.6)  4 (9.3)  1 (2.3)  12 (27.9)  2 (4.7)  13 (30.2)  10 (23.3)  7 (16.3)  2 (4.7)  9 (20.9)  5 (11.6) | 1 [0.9-1.07]  1.2 [0.6-2.22]  0.9 [0.45-1.79]  0.5 [0.2-1.42]  0.4 [0.05-2.87]  0.9 [0.46-1.82]  0.3 [0.07-1.32]  0.8 [0.36-1.7]  1 [0.44-2.39]  0.9 [0.4-2.16]  0.7 [0.17-2.68]  1.4 [0.7-2.88]  1.2 [0.5-3.12] | 0.65  0.68  0.76  0.14  0.16  0.80  0.03  0.56  0.96  0.87  0.53  0.39  0.66 |
| **Exposure to amoxicillin-clavulanate and/or 1GC/2GC, Day-7 to Day-1**  0  1 day  ≥ 2 days | 412 (77.3)  20 (3.8)  101 (18.9) | 36 (83.7)  1 (2.3)  6 (14) | 1 (ref)  0.5 [0.06-3.55]  0.7 [0.3-1.63] | 0.35  0.35  0.35 |
| **Exposure to ureido-/carboxy-penicillin and/or 3GC, Day-7 to Day-1**  0  1 day  ≥ 2 days | 351 (65.9)  31 (5.8)  151 (28.3) | 22 (51.2)  2 (4.7)  19 (44.2) | 1 (ref)  1 [0.22-4.94]  2 [1.11-3.66] | 0.12  0.12  0.12 |
| **Exposure to piperacillin-tazobactam, ceftazidime and/or cefepime, Day-7 to Day-1**  0  1 day  ≥ 2 days | 463 (86.9)  10 (1.9)  60 (11.3) | 39 (90.7)  1 (2.3)  3 (7) | 1 (ref)  1.2 [0.17-9.18]  0.5 [0.15-1.9] | 0.46  0.46  0.46 |
| **Expsure to carbapenems, Day-7 to Day-1**  0  1 day  ≥ 2 days | 321 (60.2)  27 (5.1)  185 (34.7) | 32 (74.4)  2 (4.7)  9 (20.9) | 1 (ref)  0.8 [0.22-2.63]  0.4 [0.21-0.94] | 0.06  0.06  0.06 |
| **Exposure to aminoglycoside, Day-7 to Day-1**  0  1 day  ≥ 2 days | 362 (67.9)  64 (12)  107 (20.1) | 36 (83.7)  2 (4.7)  5 (11.6) | 1 (ref)  0.3 [0.09-1.11]  0.4 [0.15-1.18] | 0.02  0.02  0.02 |
| **Exposure to fluoroquinolone, Day-7 to Day-1**  0  ≥ 1 days | 459 (86.1)  74 (13.9) | 36 (83.7)  7 (16.3) | 1 (ref)  1.2 [0.56-2.75] | 0.63  0.63 |
| **Exposure to glycopeptide, Day-7 to Day-1**  0  1 day  ≥ 2 days | 417 (78.2)  20 (3.8)  96 (18) | 36 (83.7)  1 (2.3)  6 (14) | 1 (ref)  0.5 [0.09-2.97]  0.8 [0.34-1.76] | 0.49  0.49  0.49 |
| **Exposure to linezolid, Day-7 to Day-1**  0  ≥ 1 day | 507 (95.1)  26 (4.9) | 39 (90.7)  4 (9.3) | 1 (ref)  2 [0.68-6.02] | 0.32  0.32 |
| **Exposure to macrolide, Day-7 to Day-1**  0  ≥ 1 day | 468 (87.8)  65 (12.2) | 36 (83.7)  7 (16.3) | 1 (ref)  1.4 [0.65-3.25] | 0.43  0.43 |
| **Exposure to metronidazole, Day-7 to Day-1**  0  ≥ 1 day | 469 (88)  64 (12) | 41 (95.3)  2 (4.7) | 1 (ref)  0.4 [0.08-1.55] | 0.06  0.06 |

**Table S5 (continued).**

***Table S5 footnote***

Data are expressed as number (%) or median [interquartile range].

ESBLE, extended-spectrum β-lactamase-producing *Enterobacteriaceae*; IVAC, infection-related ventilator associated complication; OR, odds ratio; CI, confidence interval; COPD, chronic obstructive pulmonary disease; LOS, length of stay; ICU, intensive care unit; SAPS II, simplified acute physiology score II; SOFA, sequential organ failure assessment; 1GC/2GC/3GC, first-/second-/third-generation cephalosporin; WBC, white blood cells; CDAD, *Clostridium difficile*-associated diarrhoea; MDRPA, multidrug-resistant *Pseudomonas aeruginosa*; AHE, AmpC-hyperproducing *Enterobacteriaceae*

**Table S6.** Factors associated with an ESBLE infection as the causative event of IVAC: multivariable logistic regression model handling recent exposure to 3GC and ureido-/carboxy-penicillins separately

| **Variable** | **Adjusted OR [95% CI]** | ***P* value** |
| --- | --- | --- |
| **MacCabe score**  0  1  2 | 1 (Ref)  1.8 [0.83 ; 3.77]  3.4 [1.27 ; 9.23] | 0.12 |
| **SAPS II at ICU admission, per point increase** | 1 [0.99-1.03] | 0.52 |
| **Glasgow coma scale ≤ 9 at Day-1 before IVAC** | 0.2 [0.05 ; 1.1] | 0.07 |
| **ICU LOS before IVAC**  < 13 days  13 to 25 days  > 25 days | 1 (Ref)  0.5 [0.22-1.09]  0.6 [0.25-1.23] | 0.20 |
| **Aminoglycoside exposure from Day-3 to IVAC Day** | 0.4 [0.13-1.52] | 0.19 |
| **Ureido-/carboxy-penicillin exposure from Day-3 to IVAC Day** | 1.4 [0.54 ; 3.45] | 0.52 |
| **3GC exposure from Day-3 to IVAC Day** | 1.7 [0.69 ; 4.11] | 0.25 |
| **Carbapenem exposure from Day-3 to IVAC Day** | 0.2 [0.05-0.6] | <0.01 |

***Table S6 footnote***

ESBLE, extended-spectrum β-lactamase-producing *Enterobacteriaceae*;IVAC, infection-related ventilator-associated complication; 3GC, third-generation cephalosporins; OR, odds ratio; CI, confidence interval; SAPS II, simplified acute physiological score II; ICU, intensive care unit; LOS, length of stay

**Table S7.** Characteristics of VAP and correlation with IVAC

|  | **First VAP** | **Second VAP** | **Third VAP** | **Total** |
| --- | --- | --- | --- | --- |
| **All episodes**  Episodes, overall  Episode with IVAC | 93  71 (73.6) | 22  18 (81.8) | 5  2 (40) | 120  91 (75.8) |
| **ESBLE VAP**  Episodes, overall  Episode with IVAC | 18  12 (66.7) | 5  5 (100) | 1  1 (100) | 24  18 (75) |
| **Non-ESBLE VAP**  Episodes, overall  Episode with IVAC | 75  59 (78.7) | 17  13 (76.5) | 4  1 (25) | 96  73 (76) |
| **Time of occurrence**  Days from ICU admission  Days from ESBLE colonization | 16 [10-24]  8 [4-15] | 26.5 [19-33]  18 [14-27] | 31 [28-33]  26 [22-33] | NA  NA |
| **Pathogens**  *Escherichia coli*  *Klebsiella pneumoniae*  *Enterobacter* spp.  *Serratia marcescens*  *Citrobacter freundii*  *Proteus* spp.  *Pseudomonas aeruginosa*  *Stenotrophomonas maltophilia*  *Acinetobacter baumannii*  *Haemophilus influenzae*  *Staphylococcus aureus*  *Enterococcus* spp.  Others | 15 (16.1)  14 (15)  7 (7.5)  4 (4.3)  3 (3.2)  1 (1.1)  33 (35.5)  11 (11.8)  1 (1.1)  2 (2.1)  10 (10.7)  4 (4.3)  16 (17.2) | 2 (9)  3 (13.6)  3 (13.6)  -  1 (4.5)  1 (4.5)  8 (3.6)  2 (9.1)  -  -  -  1 (4.5)  2 (9.1) | 1 (20)  1 (20)  1 (20)  -  -  -  1 (20)  -  1 (20)  -  -  -  1 (20) | 18 (15)  18 (15)  11 (9.2)  4 (3.3)  4 (3.3)  2 (1.7)  42 (35)  13 (10.8)  2 (1.7)  2 (1.7)  10 (8.3)  5 (4.2)  19 (15.8) |

***Table S7 footnote***

Data are expressed as number (%) or median [interquartile range].

VAP, ventilator-associated pneumonia; IVAC, infection-related ventilator-associated complication; ESBLE, extended-spectrum β-lactamase-producing *Enterobacteriaceae*; IQR, interquartile range

**Table S8.** Factors associated with ESBLE VAP as the causative event in VAP-related episodes of IVAC: results of univariate logistic regression analysis

| **Variable** | **IVAC related to non-ESBLE VAP**  **n = 73** | **IVAC related to ESBLE VAP**  **n = 18** | **Univariate OR [95% CI]** | ***P* value** |
| --- | --- | --- | --- | --- |
| **Age, years** | 66.9 [57.7-76.9] | 67.6 [60-77.7] | 1 [0.98-1.04] | 0.57 |
| **Sex, male** | 56 (76.7) | 17 (94.4) | 5.2 [0.64-41.82] | 0.03 |
| **Body mass index, kg per m2** | 26.1 [20.4-29] | 24.1 [23.1-28.8] | 1 [0.94-1.1] | 0.72 |
| **Diabetes mellitus** | 9 (12.3) | 4 (22.2) | 1 [0.99-1.02] | 0.32 |
| **COPD** | 5 (6.8) | 1 (5.6) | 0.9 [0.09-8.36] | 0.90 |
| **Immunosuppression** | 17 (23.3) | 3 (16.7) | 0.6 [0.18-2.28] | 0.44 |
| **MacCabe score**  0  1  2 | 38 (52.1)  26 (35.6)  9 (12.3) | 5 (27.8)  9 (50)  4 (22.2) | 1 (ref)  3 [0.96-9.15]  3.4 [0.77-15.08] | 0.13  0.13  0.13 |
| **Hospital LOS before ICU admission, median, days** | 2 [1-9] | 1 [1-2] | 0.91 [0.81 ; 1.02] | 0.11 |
| **Type of ICU stay**  Medical  Surgical, unscheduled  Surgical, scheduled | 51 (69.9)  13 (17.8)  9 (12.3) | 14 (77.8)  2 (11.1)  2 (11.1) | 1 (ref)  0.7 [0.17-2.77]  0.9 [0.16-4.66]. | 0.85  0.85  0.85 |
| **Characteristics at ICU admission**  Coma  Sepsis  Severe sepsis  SAPS II  SOFA score  3GC use  Carbapenem use | 13 (17.8)  60 (82.2)  59 (80.8)  35 [28-48]  8 [3-11]  43 (58.9)  4 (5.5) | 1 (5.6)  13 (72.2)  11 (61.1)  29.5 [21-47]  5.5 [4-8]  6 (33.3)  3 (16.7) | 0.3 [0.03-2.38]  0.6 [0.18-1.83]  0.4 [0.12-1.11]  1 [0.94-1.01]  0.9 [0.78-0.98]  0.3 [0.12-1.02]  3.4 [0.81-14.65] | 0.13  0.39  0.12  0.15  0.03  0.07  0.21 |
| **ESBLE carriage**  ICU LOS before carriage  ICU-acquired carriage  Carriage of ESBL-producing *Escherichia coli* | 5 [1-13]  39 (53.4)  20 (27.4) | 7.5 [3-14]  11 (61.1)  8 (44.4) | 1.05 [1 ; 1.11]  1.4 [0.48-3.96]  2.1 [0.7-6.34] | 0.08  0.54  0.23 |
| **Previous IVAC episode** | 39 (53.4) | 6 (33.3) | 0.4 [0.15-1.26] | 0.12 |
| **Characteristics at IVAC Day**  Blood lactates, mmol/L-1  WBC, per mm3  Steroids use  Urinary catheter  Arterial line catheter  Central venous catheter  Vasopressors  Renal replacement therapy  Enteral nutrition  Parenteral nutrition  Proton-pump inhibitor  Prior CDAD  MDRPA carriage  AHE carriage | 1.6 [1.3-1.9]  11900 [8400-16700]  23 (31.5)  69 (94.5)  21 (28.8)  42 (57.5)  30 (41.1)  12 (16.4)  52 (71.2)  21 (28.8)  45 (61.6)  2 (2.7)  2 (2.7)  2 (2.7) | 1.5 [1.2-1.7]  12855 [8000-19000]  4 (22.2)  17 (94.4)  4 (22.2)  9 (50)  6 (33.3)  3 (16.7)  13 (72.2)  3 (16.7)  13 (72.2)  0  0  1 (5.6) | 0.45 [0.19 ; 1.1]  1 [1 ; 1]  0.59 [0.19 ; 1.88]  0.98 [0.1 ; 9.32]  0.72 [0.23 ; 2.32]  0.79 [0.29 ; 2.17]  1.76 [0.41 ; 7.48]  1 [0.27 ; 3.7]  1.05 [0.37 ; 3]  0.5 [0.14 ; 1.83]  1.64 [0.49 ; 5.49]  NA  NA  2.11 [0.18 ; 24.75] | 0.08  0.57  0.34  0.98  0.58  0.65  0.51  0.99  0.93  0.25  0.39  NA  NA  0.62 |
| **ICU LOS before IVAC**  Median, days  LOS > 14 days | 20 [12-27]  51 (69.9) | 13.5 [10-21]  9 (50.0) | 0.96 [0.91 ; 1.01]  0.33 [0.11 ; 1.01] | 0.09  0.05 |

**Table S8 (continued).**

| **Variable** | **IVAC related to non-ESBLE VAP**  **n = 73** | **IVAC related to ESBLE VAP**  **n = 18** | **Univariate OR [95% CI]** | ***P* value** |
| --- | --- | --- | --- | --- |
| **SOFA score at Day-1 IVAC**  Median  Circulatory > 1  Circulatory > 2  Hepatic > 1  Hepatic > 2  Neurological > 1  Neurological > 2  Renal > 1  Renal > 2  Haematological > 1  Haematological > 2  Respiratory > 1  Respiratory > 2 | 6 [3-8]  30 (41.1)  28 (38.4)  15 (20.5)  8 (11)  25 (34.2)  10 (13.7)  21 (28.8)  14 (19.2)  13 (17.8)  7 (9.6)  25 (34.2)  21 (28.8) | 4 [1-6]  6 (33.3)  4 (22.2)  1 (5.6)  1 (5.6)  4 (22.2)  0  4 (22.2)  3 (16.7)  2 (11.1)  0  4 (22.2)  3 (16.7) | 0.6 [0.19-1.84]  0.7 [0.26-2.02]  0.5 [0.14-1.48]  0.2 [0.03-1.91]  0.5 [0.07-3.88]  0.6 [0.18-1.86]  -  0.6 [0.19-2.13]  0.8 [0.23-2.73]  0.6 [0.12-3.11]  -  0.5 [0.16-1.78]  0.5 [0.13-1.79] | 0.36  0.53  0.16  0.07  0.45  0.36  0.43  0.69  0.55  0.27  0.22 |
| **Exposure to amoxicillin-clavulanate and/or 1GC/2GC, Day-7 to Day-1**  0  ≥ 1 day | 57 (78.1)  17 (21.9) | 15 (83.3)  3 (16.7) | 1.5 [0.36-5.95] | 0.62 |
| **Exposure to ureido-/carboxy-penicillin and/or 3GC, Day-7 to Day-1**  0  ≥ 1 day | 46 (63)  27 (37) | 9 (50)  9 (50) | 3.2 [1.18-8.91] | 0.09 |
| **Exposure to piperacillin-tazobactam, ceftazidime and/or cefepime, Day-7 to Day-1**  0  ≥ 1 day | 68 (93.2)  5 (6.8) | 17 (94.4)  1 (5.6) | 2.6 [0.23-28.74] | 0.57 |
| **Expsure to carbapenems, Day-7 to Day-1**  0  ≥ 1 day | 48 (65.8)  25 (34.2) | 13 (72.2)  5 (27.8) | 0.2 [0.02-1.29] | 0.01 |
| **Exposure to aminoglycoside, Day-7 to Day-1**  0  ≥ 1 day | 53 (72.6)  20 (27.3) | 14 (77.8)  4 (22.2) | 0.5 [0.09-2.68] | 0.33 |
| **Exposure to fluoroquinolone, Day-7 to Day-1**  0  ≥ 1 days | 65 (89)  8 (11) | 17 (94.4)  1 (5.6) | 0.5 [0.08-3.7] | 0.48 |
| **Exposure to glycopeptide, Day-7 to Day-1**  0  ≥ 1 day | 61 (83.6)  12 (16.4) | 18 (100)  0 | - | - |
| **Exposure to linezolid, Day-7 to Day-1**  0  ≥ 1 day | 69 (94.5)  4 (5.5) | 16 (88.9)  2 (11.1) | 2 [0.29-13.17] | 0.54 |
| **Exposure to macrolide, Day-7 to Day-1**  0  ≥ 1 day | 63 (86.3)  10 (13.7) | 15 (83.3)  3 (16.7) | 1.4 [0.35-5.46] | 0.68 |
| **Exposure to metronidazole, Day-7 to Day-1**  0  ≥ 1 day | 66 (90.4)  7 (9.6) | 18 (100)  0 | - | - |

***Table S8 footnote***

Data are expressed as number (%) or median [interquartile range].

ESBLE, extended-spectrum β-lactamase-producing *Enterobacteriaceae*; IVAC, infection-related ventilator associated complication; OR, odds ratio; CI, confidence interval; COPD, chronic obstructive pulmonary disease; LOS, length of stay; ICU, intensive care unit; SAPS II, simplified acute physiology score II; SOFA, sequential organ failure assessment; 1GC/2GC/3GC, first-/second-/third-generation cephalosporin; WBC, white blood cells; CDAD, *Clostridium difficile*-associated diarrhoea; MDRPA, multidrug-resistant *Pseudomonas aeruginosa*; AHE, AmpC-hyperproducing *Enterobacteriaceae*

**Table S9.** Factors associated with ESBLE VAP as the causative event of IVAC in VAP-related episodes of IVAC : results of multivariable logistic regression analysis

| **Variable** | **Adjusted OR [95% CI]** | ***P* value** |
| --- | --- | --- |
| **MacCabe score**  0  1  2 | 1 (ref)  4.1 [1.12-14.84]  3.9 [0.79-19.18] | 0.05  0.05  0.05 |
| **Carbapenem exposure from Day-3 to IVAC Day** | 0.1 [0.02-1.14] | 0.06 |
| **ICU LOS before IVAC > 14 days** | 0.3 [0.11-1.07] | 0.06 |

***Table S9 footnote***

ESBL, extended-spectrum β-lactamase-producing *Enterobacteriaceae*;VAP, ventilator-associated pneumoniae; IVAC, infection-related ventilator-associated complication; OR, odds ratio; CI, confidence interval; ICU, intensive care unit; LOS, length of stay

**Table S10.** Relationship between IVAC and exposure to non-carbapenem antipseudomonal beta-lactams (*i.e.*, either cefepime, ceftazidime, aztreonam, ticarcillin-clavulanate or piperacillin-tazobactam) according to causative events in mechanically ventilated ESBLE carriers

|  | **Causes of IVAC** | | | |  |  |
| --- | --- | --- | --- | --- | --- | --- |
| **Variable** | **No documented infection**  **(n = 361)** | **Non-VAP infections**  **(n = 124)** | **Non-ESBLE VAP**  **(n = 73)** | **ESBLE**  **VAP**  **(n = 18)** |  | ***P* value a / b** |
| **Day-14 to Day-7 before IVAC**  Treated patient  Duration, days | 71 (19.7)  0 [0-0] | 14 (11.3)  0 [0-0] | 11 (15.1)  0 [0-0] | 2 (11.1)  0 [0-0] |  | 0.15 / 0.78  0.12 / 0.73 |
| **Day-6 to Day-4 before IVAC**  Treated patients  Duration, days | 56 (15.5)  0 [0-0] | 11 (8.9)  0 [0-0] | 5 (6.8)  0 [0-0] | 1 (5.6)  0 [0-0] |  | 0.06 / 0.70  0.04 / 0.70 |
| **Day-3 to Day-2 before IVAC**  Treated patients  Duration, days | 40 (11.1)  0 [0-0] | 7 (5.6)  0 [0-0] | 2 (2.7)  0 [0-0] | 1 (5.6)  0 [0-0] |  | 0.06 / 0.57  0.05 / 0.55 |
| **Day-1 before IVAC**  Treated patients | 29 (8) | 7 (5.6) | 1 (1.4) | 1 (5.6) |  | 0.20 / 0.22 |
| **IVAC Day to Day+3**  Treated patients  Treatment continuation  New treatment  Duration, days | 31 (8.6)  27 (7.5)  10 (2.8)  0 [0-0] | 13 (10.5)  6 (4.8)  8 (6.5)  0 [0-0] | 15 (20.5)  0 (0)  12 (16.4)  0 [0-0] | 4 (22.2)  0 (0)  2 (11.1)  0 [0-0] |  | 0.01 / 0.56  0.05 / NA  <0.01 / 0.73  0.03 / 0.71 |
| **IVAC Day to Day+7**  Treated patients  Duration, days | 35 (9.7)  0 [0-0] | 14 (11.3)  0 [0-0] | 20 (27.4)  0 [0-1] | 4 (22.2)  0 [0-0] |  | <0.01 / 0.94  <0.01 / 0.88 |
| **IVAC Day to Day+14**  Treated patients  Duration, days | 37 (10.2)  0 [0-0] | 14 (11.3)  0 [0-0] | 22 (30.1)  0 [0-1] | 5 (27.8)  0 [0-2] |  | <0.01 / 0.82  <0.01 / 0.96 |

***Table S10 footnote***

Data are expressed as number (%) or median [interquartile range].

IVAC, infection-related ventilator-associated complication; ESBLE, extended-spectrum β-lactamase-producing *Enterobacteriaceae*; VAP, ventilator-associated pneumonia

a Global comparison; b ESBLE VAP versus non-ESBLE VAP comparison.

**Table S11.** Patient outcomes according to the causative events of IVAC

| **Variable** a | **No documented infection**  **(n = 361)** | **Non-VAP infections**  **(n = 124)** | **Non-ESBLE VAP**  **(n = 73)** | **ESBLE VAP**  **(n = 18)** | ***P* value**b / c |
| --- | --- | --- | --- | --- | --- |
| **SOFA score at IVAC onset** | 5 [2-8] | 6 [3-9] | 6 [4-9] | 4 [3-6] | 0.05 / 0.12 |
| **SOFA score at IVAC termination** | 3 [1-6] | 4 [1-8] | 4 [1-9] | 5 [1-8] | 0.32 / 0.73 |
| **Death during IVAC episode** | 59 (15.4) | 20 (18.9) | 19 (27.5) | 5 (29.4) | 0.05 / 1.00 |
| **Duration of mechanical ventilation after IVAC, days** | 5 [2-8.5] | 7 [3-9] | 10 [7-16] | 11 [8-15] | <0.01 / 0.78 |

***Table S11 footnote***

Data are expressed as number (%) or median [interquartile range].

IVAC, infection-related ventilator-associated complication; VAP, ventilator-associated pneumonia; ESBLE, extended-spectrum β-lactamase-producing *Enterobacteriaceae*; SOFA, sequential organ failure assessment

a Variables were measured for each episode of IVAC, with censoring at the next episode for patients with multiple IVAC; b Global comparison; c ESBLE VAP versus non-ESBLE VAP comparison.
